# Supplementary material for: Peripheral Blood Markers Correlate with the Progression of Active Tuberculosis Relative to Latent Control of Mycobacterium tuberculosis Infection in Macaques
Source: MDPI journal article supplement (doi:10.3390/pathogens11050544), 2022-05-05
Supplement: s1 [file s1]

## Supplementary Materials

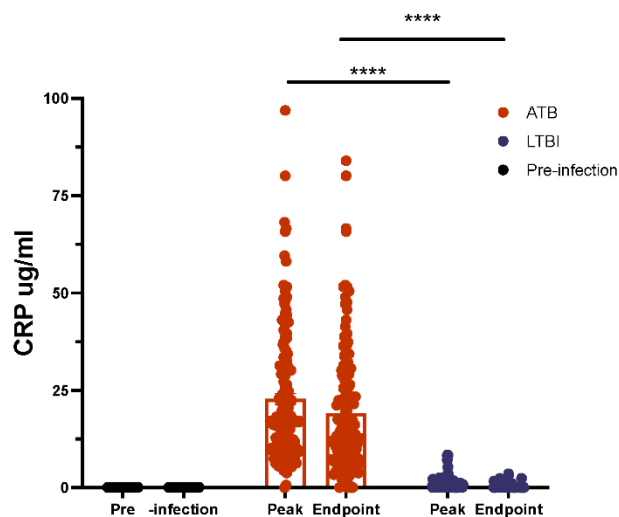

**Supplementary Figure S1: CRP values at Pre-Infection, Peak, and Endpoint.** CRP values observed during pre-infection, peak, and endpoint varied drastically between ATB (red) and LTBI (blue). (\*\*\*\*, P value of <0.0001).

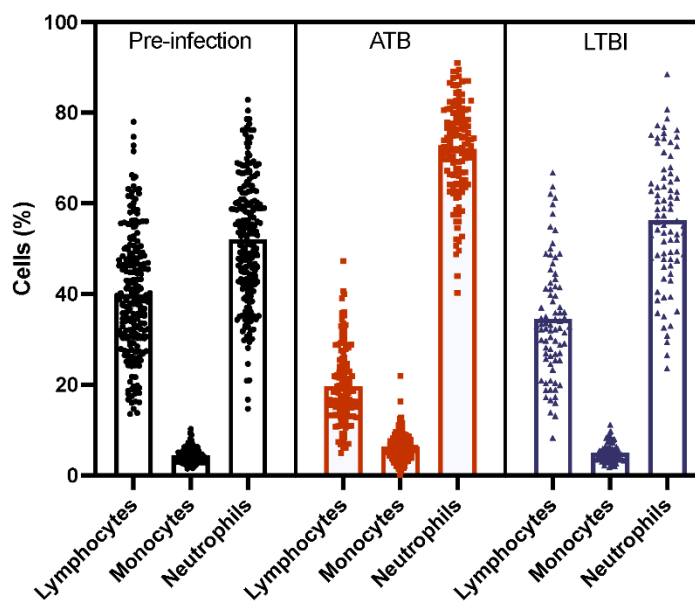

**Supplementary Figure S2: Pre-infection and Endpoint Cell Percentages.** Pre-infection (black) and Endpoint (red) and LTBI (blue) percentages of cells in peripheral blood.

## PBMC

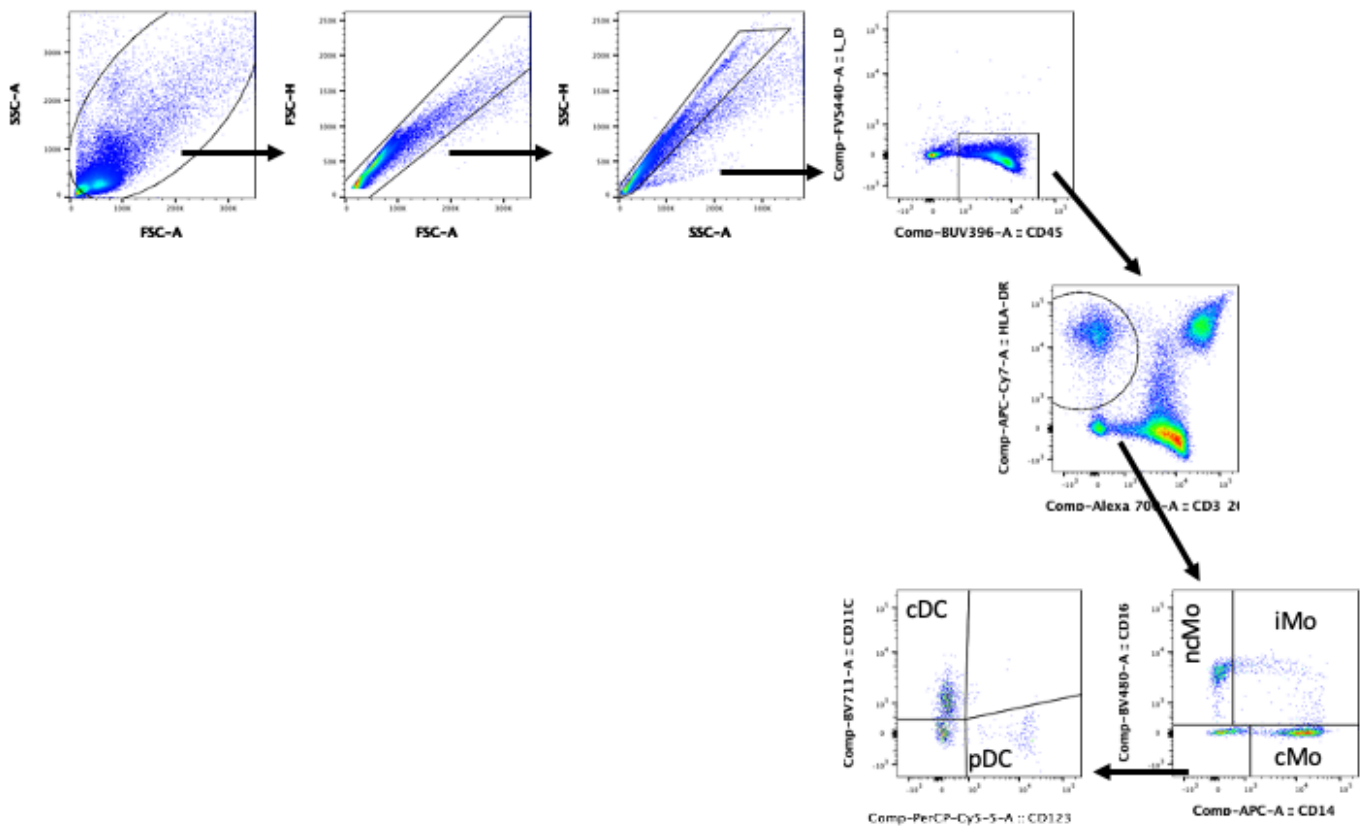

Supplementary Figure S3: Flow cytometry gating strategy for PBMCs.

## BAL/Lung

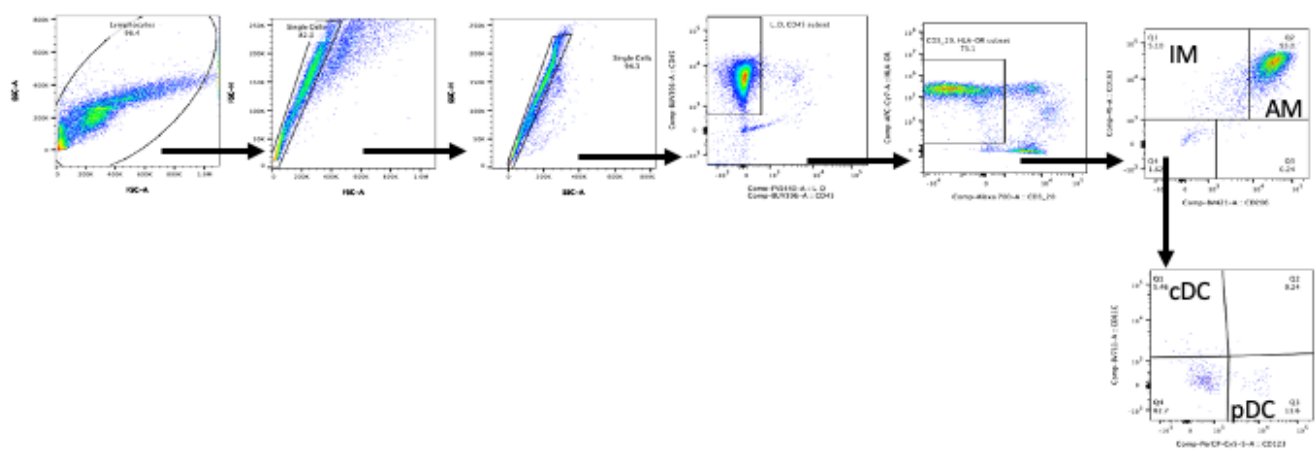

Supplementary Figure S4: Flow cytometry gating strategy for BAL and Lung tissue cells.
