# Supplementary material for: Peripheral Blood Markers Correlate with the Progression of Active Tuberculosis Relative to Latent Control of Mycobacterium tuberculosis Infection in Macaques
Source: Pathogens. 2022 May 5;11(5):544. doi: 10.3390/pathogens11050544 (PMC9146669; doi:10.3390/pathogens11050544)
Supplement: Supplementary file 1 [file pathogens-11-00544-s001.zip › supplemental data file - peripheral markers.xlsx]

## Sheet: LTBI
p-value	CFU	CFU-log10	CRP-pre	CRP-peak	CRP-endpt	A/G-pre	A/G-peak	A/G-bottom	A/G-endpt	Lympho-pre	Lympho-peak	Lympho-bottom	Lympho-endpt	Mono-pre	Mono-peak	Mono-bottom	Mono-endpt	Neutro-pre	Neutro-peak	Neutro-bottom	Neutro-endpt
CFU	#N/A	1.8372e-12	#N/A	0.00904637	0.0179456			0.0301112	0.000550133						0.0123793		0.0483134
CFU-log10	1.8372e-12	#N/A	#N/A	0.000404841	0.0240627			0.0130419	0.000774769
CRP-pre	#N/A	#N/A	#N/A	#N/A	#N/A	#N/A	#N/A	#N/A	#N/A	#N/A	#N/A	#N/A	#N/A	#N/A	#N/A	#N/A	#N/A	#N/A	#N/A	#N/A	#N/A
CRP-peak	0.00904637	0.000404841	#N/A	#N/A	0.000301651							0.0490888							0.00597474
CRP-endpt	0.0179456	0.0240627	#N/A	0.000301651	#N/A						0.0282207	0.0147894	0.00246695				0.0328597		0.0325677		0.00510892
A/G-pre			#N/A			#N/A	3.83173e-11	0.0161305	0.00361791
A/G-peak			#N/A			3.83173e-11	#N/A	6.47389e-05	7.53994e-05
A/G-bottom	0.0301112	0.0130419	#N/A			0.0161305	6.47389e-05	#N/A	1.17034e-07
A/G-endpt	0.000550133	0.000774769	#N/A			0.00361791	7.53994e-05	1.17034e-07	#N/A						0.00537646		0.0162405
Lympho-pre			#N/A							#N/A	0	6.06182e-14	1.11579e-05					0	9.69569e-09	3.31424e-12	0.000135909
Lympho-peak			#N/A		0.0282207					0	#N/A	4.11071e-12	2.0104e-10				0.0359123	7.99361e-15	5.44209e-08	0	1.77298e-09
Lympho-bottom			#N/A	0.0490888	0.0147894					6.06182e-14	4.11071e-12	#N/A	5.67191e-11			0.0491379		6.12843e-14	0	5.72653e-11	1.16005e-09
Lympho-endpt			#N/A		0.00246695					1.11579e-05	2.0104e-10	5.67191e-11	#N/A					3.09053e-05	1.33862e-06	6.74719e-10	0
Mono-pre			#N/A											#N/A	1.74524e-09	1.46549e-13	5.72682e-05
Mono-peak	0.0123793		#N/A						0.00537646					1.74524e-09	#N/A	5.10295e-05	2.02505e-13			0.00416267	0.0208327
Mono-bottom			#N/A									0.0491379		1.46549e-13	5.10295e-05	#N/A	1.18136e-07		0.000194617		0.0325538
Mono-endpt	0.0483134		#N/A		0.0328597				0.0162405		0.0359123			5.72682e-05	2.02505e-13	1.18136e-07	#N/A			0.000601533	0.00272773
Neutro-pre			#N/A							0	7.99361e-15	6.12843e-14	3.09053e-05					#N/A	2.03954e-10	6.12976e-12	4.03112e-05
Neutro-peak			#N/A	0.00597474	0.0325677					9.69569e-09	5.44209e-08	0	1.33862e-06			0.000194617		2.03954e-10	#N/A	2.63031e-08	1.0203e-07
Neutro-bottom			#N/A							3.31424e-12	0	5.72653e-11	6.74719e-10		0.00416267		0.000601533	6.12976e-12	2.63031e-08	#N/A	1.82085e-11
Neutro-endpt			#N/A		0.00510892					0.000135909	1.77298e-09	1.16005e-09	0		0.0208327	0.0325538	0.00272773	4.03112e-05	1.0203e-07	1.82085e-11	#N/A
coefficient	CFU	CFU-log10	CRP-pre	CRP-peak	CRP-endpt	A/G-pre	A/G-peak	A/G-bottom	A/G-endpt	Lympho-pre	Lympho-peak	Lympho-bottom	Lympho-endpt	Mono-pre	Mono-peak	Mono-bottom	Mono-endpt	Neutro-pre	Neutro-peak	Neutro-bottom	Neutro-endpt
CFU	#N/A	0.69411	#N/A	0.297539	0.270876			-0.24733	-0.384762						0.283787		0.225805
CFU-log10	0.69411	#N/A	#N/A	0.395584	0.258661			-0.281772	-0.375139
CRP-pre	#N/A	#N/A	#N/A	#N/A	#N/A	#N/A	#N/A	#N/A	#N/A	#N/A	#N/A	#N/A	#N/A	#N/A	#N/A	#N/A	#N/A	#N/A	#N/A	#N/A	#N/A
CRP-peak	0.297539	0.395584	#N/A	#N/A	0.398535							-0.225049							0.310588
CRP-endpt	0.270876	0.258661	#N/A	0.398535	#N/A						-0.250154	-0.276854	-0.340211				0.243478		0.243874		0.316046
A/G-pre			#N/A			#N/A	0.659587	0.269947	0.323664
A/G-peak			#N/A			0.659587	#N/A	0.433896	0.430349
A/G-bottom	-0.24733	-0.281772	#N/A			0.269947	0.433896	#N/A	0.554148
A/G-endpt	-0.384762	-0.375139	#N/A			0.323664	0.430349	0.554148	#N/A						-0.31035		-0.269679
Lympho-pre			#N/A							#N/A	0.783636	0.72188	0.472197					-0.959985	-0.591163	-0.685097	-0.416257
Lympho-peak			#N/A		-0.250154					0.783636	#N/A	0.682951	0.640795				0.236445	-0.73861	-0.566019	-0.904272	-0.613989
Lympho-bottom			#N/A	-0.225049	-0.276854					0.72188	0.682951	#N/A	0.655257			0.222116		-0.721805	-0.866546	-0.655151	-0.619417
Lympho-endpt			#N/A		-0.340211					0.472197	0.640795	0.655257	#N/A					-0.450566	-0.512997	-0.626203	-0.938725
Mono-pre			#N/A											#N/A	0.614193	0.714238	0.436721
Mono-peak	0.283787		#N/A						-0.31035					0.614193	#N/A	0.439356	0.711372			-0.319016	-0.25967
Mono-bottom			#N/A									0.222116		0.714238	0.439356	#N/A	0.554		-0.407354		-0.24078
Mono-endpt	0.225805		#N/A		0.243478				-0.269679		0.236445			0.436721	0.711372	0.554	#N/A			-0.37763	-0.33281
Neutro-pre			#N/A							-0.959985	-0.73861	-0.721805	-0.450566					#N/A	0.640626	0.678922	0.444675
Neutro-peak			#N/A	0.310588	0.243874					-0.591163	-0.566019	-0.866546	-0.512997			-0.407354		0.640626	#N/A	0.576876	0.556309
Neutro-bottom			#N/A							-0.685097	-0.904272	-0.655151	-0.626203		-0.319016		-0.37763	0.678922	0.576876	#N/A	0.667609
Neutro-endpt			#N/A		0.316046					-0.416257	-0.613989	-0.619417	-0.938725		-0.25967	-0.24078	-0.33281	0.444675	0.556309	0.667609	#N/A

## Sheet: ATB
p-value	CFU-endpt	CFU-endptlog10	CRP-pre	CRP-peak	CRP-endpt	CRP-peaklog10	CRP-endlog10	A/G-pre	A/G-peak	A/G-bottom	A/G-endpt	Lympho-pre	Lympho-peak	Lympho-bottom	Lympho-endpt	Mono-pre	Mono-peak	Mono-bottom	Mono-endpt	Neutro-pre	Neutro-peak	Neutro-bottom	Neutro-endpt
CFU-endpt	#N/A	0	#N/A	2.71803e-08	5.47569e-08	7.56306e-06	0.000643154							0.0129314	0.0104815						0.0192517		0.0105025
CFU-endptlog10	0	#N/A	#N/A	1.69953e-12	8.92619e-14	3.89688e-12	2.28795e-08			0.0373174	0.00375347			0.0339283	0.0438295	0.0484896
CRP-pre	#N/A	#N/A	#N/A	#N/A	#N/A	#N/A	#N/A	#N/A	#N/A	#N/A	#N/A	#N/A	#N/A	#N/A	#N/A	#N/A	#N/A	#N/A	#N/A	#N/A	#N/A	#N/A	#N/A
CRP-peak	2.71803e-08	1.69953e-12	#N/A	#N/A	0	0	1.06581e-14				0.0228036		0.0159783	0.00431608	0.000513374	0.00844298							0.00830574
CRP-endpt	5.47569e-08	8.92619e-14	#N/A	0	#N/A	0	0				0.0106166	0.0133332	0.00321141	0.0109145	0.000669362	0.00553966						0.0481288	0.0171358
CRP-peaklog10	7.56306e-06	3.89688e-12	#N/A	0	0	#N/A	0			0.000442929	8.88984e-05		0.0333341	0.00277423	0.000152413	0.00775952	0.0211733						0.00539145
CRP-endlog10	0.000643154	2.28795e-08	#N/A	1.06581e-14	0	0	#N/A			2.26309e-05	3.19372e-08	0.0460488	0.0233733	0.000958009	1.31508e-05	0.0311789	0.0295089	0.0286243	0.0074532		0.0247844		0.00107259
A/G-pre			#N/A					#N/A	0	0.00174638	0.00472756					0.00148641
A/G-peak			#N/A					0	#N/A	0.000269064	0.000247953					0.046991
A/G-bottom		0.0373174	#N/A			0.000442929	2.26309e-05	0.00174638	0.000269064	#N/A	0			0.00325463	0.0028354						0.00613543		0.00220327
A/G-endpt		0.00375347	#N/A	0.0228036	0.0106166	8.88984e-05	3.19372e-08	0.00472756	0.000247953	0	#N/A			0.00872635	0.00193335						0.0216145		0.0040169
Lympho-pre			#N/A		0.0133332		0.0460488					#N/A	0	1.61309e-09	4.06721e-05					0	1.26949e-06	0	0.000656839
Lympho-peak			#N/A	0.0159783	0.00321141	0.0333341	0.0233733					0	#N/A	1.45171e-09	1.73869e-06					0	2.7311e-06	0	0.000144286
Lympho-bottom	0.0129314	0.0339283	#N/A	0.00431608	0.0109145	0.00277423	0.000958009			0.00325463	0.00872635	1.61309e-09	1.45171e-09	#N/A	0		0.0403236	0.00352376	0.00222216	2.24448e-08	0	1.51955e-08	0
Lympho-endpt	0.0104815	0.0438295	#N/A	0.000513374	0.000669362	0.000152413	1.31508e-05			0.0028354	0.00193335	4.06721e-05	1.73869e-06	0	#N/A				0.0218957	9.53135e-05	0	3.18878e-06	0
Mono-pre		0.0484896	#N/A	0.00844298	0.00553966	0.00775952	0.0311789	0.00148641	0.046991							#N/A	5.53491e-11	1.86517e-14	4.83372e-09	0.00478373	0.0171265
Mono-peak			#N/A			0.0211733	0.0295089							0.0403236		5.53491e-11	#N/A	2.94854e-09	0		2.28719e-06		0.000213297
Mono-bottom			#N/A				0.0286243							0.00352376		1.86517e-14	2.94854e-09	#N/A	9.48981e-11	0.0214239	7.6764e-06		0.0248484
Mono-endpt			#N/A				0.0074532							0.00222216	0.0218957	4.83372e-09	0	9.48981e-11	#N/A		2.58124e-08		6.47269e-07
Neutro-pre			#N/A									0	0	2.24448e-08	9.53135e-05	0.00478373		0.0214239		#N/A	3.29549e-07	0	0.000272445
Neutro-peak	0.0192517		#N/A				0.0247844			0.00613543	0.0216145	1.26949e-06	2.7311e-06	0	0	0.0171265	2.28719e-06	7.6764e-06	2.58124e-08	3.29549e-07	#N/A	1.39149e-07	0
Neutro-bottom			#N/A		0.0481288							0	0	1.51955e-08	3.18878e-06					0	1.39149e-07	#N/A	9.66741e-06
Neutro-endpt	0.0105025		#N/A	0.00830574	0.0171358	0.00539145	0.00107259			0.00220327	0.0040169	0.000656839	0.000144286	0	0		0.000213297	0.0248484	6.47269e-07	0.000272445	0	9.66741e-06	#N/A
coefficient	CFU-endpt	CFU-endptlog10	CRP-pre	CRP-peak	CRP-endpt	CRP-peaklog10	CRP-endlog10	A/G-pre	A/G-peak	A/G-bottom	A/G-endpt	Lympho-pre	Lympho-peak	Lympho-bottom	Lympho-endpt	Mono-pre	Mono-peak	Mono-bottom	Mono-endpt	Neutro-pre	Neutro-peak	Neutro-bottom	Neutro-endpt
CFU-endpt	#N/A	0.69358	#N/A	0.459146	0.450065	0.378678	0.292194							-0.215845	-0.222101						0.203524		0.222042
CFU-endptlog10	0.69358	#N/A	#N/A	0.561462	0.587123	0.555567	0.459783			-0.180772	-0.249668			-0.18407	-0.175085	0.171435
CRP-pre	#N/A	#N/A	#N/A	#N/A	#N/A	#N/A	#N/A	#N/A	#N/A	#N/A	#N/A	#N/A	#N/A	#N/A	#N/A	#N/A	#N/A	#N/A	#N/A	#N/A	#N/A	#N/A	#N/A
CRP-peak	0.459146	0.561462	#N/A	#N/A	0.903182	0.897556	0.604435				-0.197333		-0.208588	-0.245988	-0.297177	0.227526							0.227993
CRP-endpt	0.450065	0.587123	#N/A	0.903182	#N/A	0.80709	0.728014				-0.220894	-0.214114	-0.253715	-0.220081	-0.291302	0.239278						0.171707	0.206417
CRP-peaklog10	0.378678	0.555567	#N/A	0.897556	0.80709	#N/A	0.666307			-0.301496	-0.334416		-0.185376	-0.258415	-0.32378	0.230787	0.20048						0.240913
CRP-endlog10	0.292194	0.459783	#N/A	0.604435	0.728014	0.666307	#N/A			-0.358508	-0.457078	-0.173308	-0.196532	-0.283158	-0.367979	0.186957	0.188818	0.18984	0.231061		0.194616		0.280541
A/G-pre			#N/A					#N/A	0.767682	0.268949	0.24356					-0.272838
A/G-peak			#N/A					0.767682	#N/A	0.310987	0.312687					-0.172576
A/G-bottom		-0.180772	#N/A			-0.301496	-0.358508	0.268949	0.310987	#N/A	0.957682			0.253371	0.256902						-0.23648		-0.263241
A/G-endpt		-0.249668	#N/A	-0.197333	-0.220894	-0.334416	-0.457078	0.24356	0.312687	0.957682	#N/A			0.226581	0.266466						-0.199063		-0.247887
Lympho-pre			#N/A		-0.214114		-0.173308					#N/A	0.874616	0.493297	0.347931					-0.928303	-0.405691	-0.789278	-0.291724
Lympho-peak			#N/A	-0.208588	-0.253715	-0.185376	-0.196532					0.874616	#N/A	0.494502	0.40088					-0.828122	-0.393838	-0.908397	-0.3237
Lympho-bottom	-0.215845	-0.18407	#N/A	-0.245988	-0.220081	-0.258415	-0.283158			0.253371	0.226581	0.493297	0.494502	#N/A	0.799685		0.178051	0.251314	0.263029	-0.461583	-0.915493	-0.46649	-0.776938
Lympho-endpt	-0.222101	-0.175085	#N/A	-0.297177	-0.291302	-0.32378	-0.367979			0.256902	0.266466	0.347931	0.40088	0.799685	#N/A				0.198647	-0.331858	-0.717141	-0.391385	-0.932897
Mono-pre		0.171435	#N/A	0.227526	0.239278	0.230787	0.186957	-0.272838	-0.172576							#N/A	0.529691	0.60175	0.480468	-0.243244	-0.206434
Mono-peak			#N/A			0.20048	0.188818							0.178051		0.529691	#N/A	0.486312	0.845055		-0.396624		-0.315792
Mono-bottom			#N/A				0.18984							0.251314		0.60175	0.486312	#N/A	0.524153	-0.199348	-0.377086		-0.194532
Mono-endpt			#N/A				0.231061							0.263029	0.198647	0.480468	0.845055	0.524153	#N/A		-0.459805		-0.415749
Neutro-pre			#N/A									-0.928303	-0.828122	-0.461583	-0.331858	-0.243244		-0.199348		#N/A	0.42551	0.819871	0.310727
Neutro-peak	0.203524		#N/A				0.194616			-0.23648	-0.199063	-0.405691	-0.393838	-0.915493	-0.717141	-0.206434	-0.396624	-0.377086	-0.459805	0.42551	#N/A	0.437547	0.812872
Neutro-bottom			#N/A		0.171707							-0.789278	-0.908397	-0.46649	-0.391385					0.819871	0.437547	#N/A	0.373218
Neutro-endpt	0.222042		#N/A	0.227993	0.206417	0.240913	0.280541			-0.263241	-0.247887	-0.291724	-0.3237	-0.776938	-0.932897		-0.315792	-0.194532	-0.415749	0.310727	0.812872	0.373218	#N/A
